# Supplementary material for: Exploring Leishmania secretory proteins to design B and T cell multi-epitope subunit vaccine using immunoinformatics approach
Source: PubMed Central journal article supplement (PMC5557753; doi:10.1038/s41598-017-08842-w), 2017-08-15
Supplement: 41598_2017_8842_MOESM1_ESM.pdf [file 41598_2017_8842_MOESM1_ESM.pdf]

**Exploring *Leishmania* secretory proteins to design B and T cell multi-epitope subunit vaccine using immunoinformatics approach**

**Nazia Khatoon<sup>#</sup>, Rajan Kumar Pandey<sup>#</sup>, Vijay Kumar Prajapati\***

Department of Biochemistry, School of Life Sciences, Central University of Rajasthan, NH-8, Bandarsindri, Kishangarh, 305817, Ajmer, Rajasthan, India

<sup>#</sup>Contributed equally to this work.

**\*Corresponding author address**

**Dr. Vijay Kumar Prajapati**  
Department of Biochemistry,  
School of Life Sciences,  
Central University of Rajasthan,  
NH-8, Bandarsindri, Kishangarh,  
305817, Ajmer, Rajasthan, India  
Email- vkprajapati@curaj.ac.in

**Supplementary table 1:** Predicted CTL epitopes for *Leishmania donovani* secretory proteins

| S. No. | Sequence id  | Epitopes         | Score         |
|--------|--------------|------------------|---------------|
| 1      | LdBPK_190160 | TTGIARGAY        | 2.1103        |
|        |              | SSEVPTGSY        | 2.8708        |
|        |              | ASEDDIAAY        | 2.7231        |
|        |              | LSTDDGATY        | 2.0833        |
|        |              | STCTMDAAY        | 2.9323        |
|        |              | QLTLSSLFY        | 2.1468        |
|        |              | <b>LSSLFYLPY</b> | <b>3.3553</b> |
|        |              | <b>NSSTDLLDY</b> | <b>3.0863</b> |
|        |              | LLDYKAAQY        | 2.5937        |
|        |              | GSAGKSFNY        | 2.0306        |
| 2      | LdBPK_211410 | CTHASMALV        | 0.7588        |
|        |              | <b>YTEAQLHT</b>  | <b>1.4547</b> |
|        |              | ATNWAQLAV        | 0.9146        |
|        |              | <b>WMDLHSNRL</b> | <b>1.0307</b> |
|        |              | MTFLNLLLL        | 0.9509        |
|        |              | TVDEAVMSV        | 0.829         |
|        |              | AVDGSDATF        | 0.8317        |
| 3      | LdBPK_310120 | SAHVGSSVY        | 1.0079        |
|        |              | FMHPRMKTY        | 1.239         |
|        |              | <b>QVDWLVALY</b> | <b>3.1899</b> |
|        |              | GQDGKVQGY        | 1.0879        |
|        |              | AAAVKSVEY        | 1.442         |
|        |              | DTEGKVRCY        | 1.7273        |
|        |              | LLNLNGMLY        | 2.1102        |
|        |              | VTTIKGGVY        | 2.4195        |
|        |              | YVFQTSTPY        | 1.2417        |
|        |              | TVGTRIRLY        | 1.0238        |
|        |              | <b>FTDSISLSF</b> | <b>3.2792</b> |
|        |              | IIEPEAVQY        | 1.3645        |
| 4      | LdBPK_220130 | PAEDSNAIY        | 1.8882        |
|        |              | <b>KSETVSIQY</b> | <b>3.0954</b> |
|        |              | DSATNQTYF        | 1.0139        |
|        |              | GSTGYDPAY        | 1.2708        |
|        |              | YINADHQRY        | 1.736         |
| 5      | LdBPK_310860 | SLQYANVTY        | 1.4446        |
|        |              | <b>SADFQHVPY</b> | <b>2.478</b>  |
|        |              | KVDMRDHFF        | 1.0015        |
|        |              | GAAGDAMLY        | 1.5074        |
|        |              | QTDARRSLQ        | 0.9877        |

**Supplementary table 2:** Predicted HTL epitopes for *Leishmania donovani* secretory proteins

| S. No. | Accession no. | Alleles | Start | End | Sequence         | Percentile |
|--------|---------------|---------|-------|-----|------------------|------------|
| 1      | LdBPK_190160  | H2-IAAd | 235   | 249 | VESMQALQAASIVIA  | 0.03       |
|        |               | H2-IAAb | 221   | 235 | FTSNVVYLPATATLV  | 0.2        |
|        |               | H2-IEAd | 761   | 775 | QVDLASVVRGRRKWM  | 4.96       |
| 2      | LdBPK_211410  | H2-IAAd | 1     | 15  | MCTHASMALVAAVAL  | 0.03       |
|        |               | H2-IAAb | 451   | 465 | ATFSSWDASASSASN  | 1.04       |
|        |               | H2-IEAd | 127   | 141 | LPASWGLLRNLRKVR  | 17.41      |
| 3      | LdBPK_310120  | H2-IAAd | 743   | 757 | FNMHFMAAIKYTLIV  | 0.54       |
|        |               | H2-IAAb | 398   | 412 | TNAAYALSTPLVINA  | 0.48       |
|        |               | H2-IEAd | 691   | 705 | VGTRIRLYRERFHKP  | 9.64       |
| 4      | LdBPK_220130  | H2-IAAd | 210   | 224 | LGVVKMIKAMKHSKG  | 0.55       |
|        |               | H2-IAAb | 72    | 86  | FPSFHAGSKANVVIA  | 3.85       |
|        |               | H2-IEAd | 260   | 274 | EVLHKKLSTSRARRA  | 17.71      |
| 5      | LdBPK_310860  | H2-IAAd | 173   | 187 | VALLAAVDVQAHVNR  | 0.19       |
|        |               | H2-IAAb | 247   | 261 | HVPYEVYCAAAAAGTN | 1.8        |
|        |               | H2-IEAd | 135   | 149 | FQRSYLAVRRTVRAA  | 12.78      |

**Supplementary table 3:** Predicted B cell epitopes for the final vaccine construct protein proteins

| S. No. | Position | Epitope              | Score |
|--------|----------|----------------------|-------|
| 1      | 317      | SSWDASASSASNGPGPLPA  | 1     |
| 2      | 500      | YCAAAAAGTNGPGPFQRSYL | 1     |
| 3      | 386      | INAGPGPGVGTRIRLYRERF | 1     |
| 4      | 421      | KAMKHSKGGPGPFPSFHAG  | 1     |
| 5      | 456      | LHKKLSTSRARRAGPGGVA  | 1     |
| 6      | 219      | YSADFQHVPYGPVGVESMQ  | 1     |
| 7      | 479      | AVDVQAHVNRGPGGHVPYE  | 1     |
| 8      | 262      | PATATLVGPGGQVDLASVY  | 1     |
| 9      | 241      | QAASIVIAGPGPGFTSNVVY | 1     |
| 10     | 360      | AAIKYTLIVGPGGTNAAYA  | 1     |
| 11     | 43       | AAAGAAPAGAAVEAAEEQSE | 0.999 |
| 12     | 339      | GLLRNLRKVRGPGPFNMHF  | 0.999 |
| 13     | 283      | GRRKWMGPGGMCTHASMAL  | 0.998 |

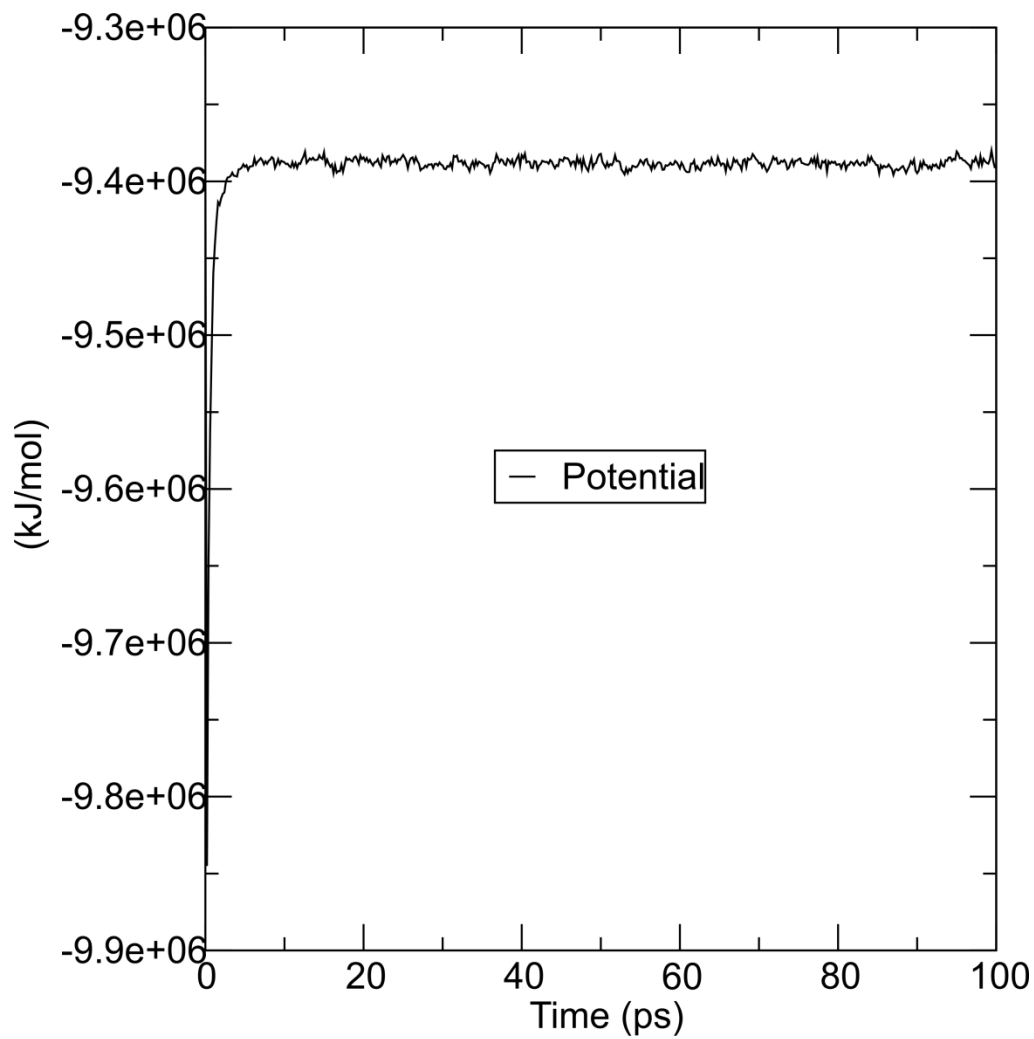

Supplementary figure1: Potential energy of protein ligand (TLR-4 vaccine) complex as a function of energy minimization step during molecular dynamics simulation.

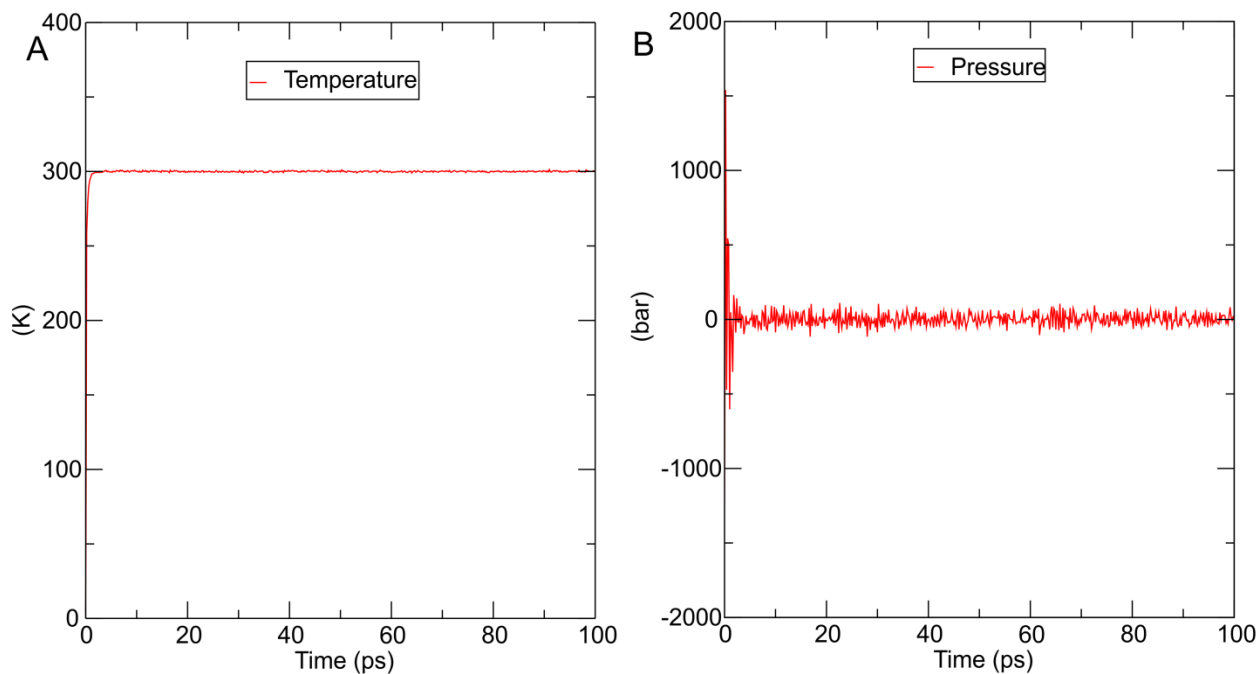

**Supplementary figure 2: Molecular dynamics simulation study of protein ligand (TLR-4 vaccine) complex** (A) Temperature progression curve indicating that temperature of the system reaches a up to 300K and remains stable for rest of the equilibration period (100 ps) (B) Pressure progression curve indicating pressure fluctuation up to 1bar.
